# Supplementary material
Source: publisher figshare collection journal article supplement (https://frontiersin.figshare.com/ndownloader/files/23896493)
Supplement: Supplementary file 1 [file 23896493]

## Sheet: StEliasRockAvalanchesFinal
RA	Area (km2)	Image Year	Image Date	Event Date	Other Images Used for Mapping	Notes	Latitude at headscarp point	Longitude at headscarp point	Horizontal Travel Distance (m)	Fall Height (m)	Maximum Elevation (m)	Slope at headscarp point (degrees)	Aspect at headscarp point (degrees azimuth)	Minimum Elevation (m)	H/L	Bedrock Geology (Richter et al., 2006)
1	0.830253	1984	28-Jul	6/7/83-7/28/84			60.1731	-139.794	2746.31	1075.41	2439.25	48.4562	69.78	1363.84	0.391584	Tgp
2	0.410183	1984	28-Jul	6/17/84-7/28/84	9/12/84		60.1022	-140.341	1881.4	785.356	1626.93	43.2734	302.02	841.576	0.417432	Kyf
3	0.291251	1985	15-Jul	6/29/85-7/15/85			60.1757	-139.943	1686.54	783.354	3291.28	41.1097	19.5335	2507.93	0.464474	Tgp
4	1.42483	1985	15-Jul	6/29/85-7/15/85			60.1169	-139.743	3507.77	841.841	1715.8	32.2649	179.581	873.957	0.239993	Kym
5	0.276042	1986	16-Jun	5/6/86-6/16/86	9/11/86		60.0872	-140.094	1506.25	384.41	1233.96	30.0255	188.649	849.548	0.25521	Kyf
6	0.446351	1986	18-Jul	6/16/86-7/18/86	9/11/86		60.0479	-140.098	1218.75	317.152	1225.36	42.5227	73.7602	908.204	0.260227	Kyf
7	0.42216	1986	18-Jul	6/16/86-7/18/86	9/11/86		60.0777	-139.898	1595.81	570.492	1552.05	46.0065	223.663	981.561	0.357495	Kyf
8	1.34593	1986	18-Jul	6/30/86-7/18/86	9/11/86		60.1044	-140.341	3458.63	851.971	1561.76	41.3437	237.26	709.791	0.246332	Kyf
9	2.20753	1986	11-Sep	6/30/86-9/11/86			60.3177	-141.043	4362.09	1797.07	3507.34	44.0518	178.068	1710.27	0.411974	Kvg
10	0.558046	1987	28-Jul	7/5/87-7/28/87	8/29/87		60.2067	-139.897	1389.56	537.362	2410.51	50.4701	6.2646	1873.15	0.386713	Tgp
11	0.448828	1987	29-Aug	7/28/87-8/29/87		Source area is obscured by shadows.	60.0932	-139.879	2094.37	993.277	2073.29	34.7515	309.056	1080.01	0.474261	Kyf
12	0.461403	1987	29-Aug	7/28/87-8/29/87		Source area is obscured by shadows.	60.0984	-140.351	1596.56	482.744	1271.53	47.2946	277.621	788.785	0.302366	Kyf
13	0.195102	1988	23-Jul	6/27/88-7/23/88	9/9/88		60.0775	-139.951	835.997	283.626	1416.22	46.2012	25.4461	1132.6	0.339267	Kyf
14	1.45608	1988	9-Sep	7/23/88-9/9/88		Dust cloud that extends beyond the deposit extent is visible in imagery.	60.0929	-139.874	2691.97	1007.62	2101.99	49.5835	336.532	1094.37	0.374305	Kyf
15	0.678352	1988	27-Jun	5/4/88-6/27/88			60.0997	-140.348	1839.82	580.885	1368.91	28.6709	274.288	788.029	0.315729	Kyf
16	0.159556	1988	11-Jun	8/29/87-6/11/88	6/27/88		60.2348	-140.456	1094.31	598.904	1709.09	52.187	177.294	1110.18	0.547291	Kyf (Ql)
17	1.0621	1988	27-Jun	8/29/87-6/27/88		Source area is partially obscured by clouds.	60.2404	-140.981	2468.47	921.053	1900.84	33.1544	54.7075	979.783	0.373127	Kyf
18	0.16748	1988	27-Jun	5/4/88-6/27/88	9/9/88		60.1646	-140.346	907.636	451.38	1596.08	45.6128	15.4755	1144.7	0.497314	QTy
19	3.22319	1989	21-Apr	3/20/89-4/21/89			60.1596	-139.949	5581.07	2208.78	3521.18	45.4641	165.436	1312.4	0.395763	Tgp
20	0.296697	1989	8-Jun	4/21/89-6/8/89			60.086	-139.978	1415.44	554.738	1588.33	40.9559	137.505	1033.6	0.391919	Kyf
21	0.572456	1989	11-Aug	3/20/89-8/11/89	1989-08-27		60.0922	-139.762	2184.75	642.588	1436.98	31.7575	232.783	794.394	0.294124	Kyf
22	1.25196	1989	8-Jun	3/20/89-6/8/89			60.1167	-139.742	3406.1	845.093	1713.87	35.363	199.794	868.78	0.248111	Kym
23	0.51176	1989	11-Aug	6/8/89-8/11/89	8/27/89	Extent of source area is uncertain.	60.0854	-140.087	1893.69	535.201	1350.11	31.0245	250.059	814.909	0.282623	Kyf
24	0.436975	1989	8-Jun	3/20/89-6/8/89			60.102	-140.339	1843.63	889.462	1725.31	47.8354	310.427	835.848	0.482452	Kyf
25	0.653957	1990	26-May	4/8/90-5/26/90			60.1025	-140.339	2429.7	887.841	1681.45	41.0995	308.762	793.612	0.365411	Kyf
26	0.278797	1990	27-Jun	5/26/90-6/27/90	7/20/90		60.1136	-140.316	1380.28	423.537	1509.83	24.9632	59.4105	1086.3	0.306848	Kyf
27	0.261691	1990	12-Aug	7/20/90-8/12/90			60.2609	-140.461	1565.51	1049.03	2318.94	50.139	210.306	1269.9	0.670088	Kvg
28	0.578086	1990	20-Jul	5/26/90-7/20/90			60.1254	-139.739	1953.39	799.903	2113.76	37.1756	327.274	1313.86	0.409495	Kyn
29	0.33834	1991	4-May	3/24/91-5/4/91	6/21/91		60.1803	-140.59	2037.08	696.245	1243.83	50.2622	160.514	547.586	0.341786	QTy
30	0.253403	1991	14-Jun	5/4/91-6/14/91	6/21/91		60.2812	-139.491	997.329	339.263	2217.01	53.4565	293.918	1877.75	0.340171	Pzk
31	0.558271	1992	2-Jul	5/22/92-7/2/92	8/10/92		60.1241	-140.316	2743.23	735.473	1721.89	38.3471	130.994	986.415	0.268105	Kyf
32	0.473791	1992	10-Aug	7/2/92-8/10/92			60.1048	-140.325	2772.98	1158.82	1930.07	43.9081	168.623	771.247	0.417898	Kyf
33	4.35987	1992	2-Aug	7/25/92-8/2/92	8/10/92		60.0436	-139.812	6460.49	1200.82	1880.49	31.139	264.962	679.672	0.185871	Kyf
34	1.06865	1992	2-Aug	7/2/92-8/2/92	8/10/92		60.1342	-139.828	2876.16	1015.37	2073.84	34.9631	208.787	1058.48	0.353029	Tgp
35	0.223626	1992	25-Jul	7/2/92-7/25/92	8/10/92		60.0103	-139.708	1359.23	781.095	1638.36	47.6553	314.145	857.269	0.574661	Kyf
36	2.01752	1992	22-May	4/4/92-5/22/92	7/2/92	Source area is obscured by shadows.	59.994	-139.724	5992.9	1111.82	1605.38	31.8169	303.156	493.561	0.185523	Kyf
37	0.169212	1992	2-Jul	5/22/92-7/2/92			60.1043	-140.335	1759.89	985.395	1864.85	46.3431	237.604	879.452	0.559917	Kyf
38	0.24503	1993	1-Jun	5/16/93-6/1/93	7/12/93		60.1686	-140.18	1059.77	361.635	1600.42	53.4536	146.13	1238.78	0.341239	Kym
39	0.244239	1993	12-Jul	6/1/93-7/12/93			60.2688	-140.399	1296.95	782.071	1912.25	45.72	148.228	1130.18	0.603007	Kvg
40	0.829181	1993	12-Jul	6/1/93-7/12/93	9/5/93		60.12	-140.059	2585.39	521.738	1615.24	45.2873	144.388	1093.5	0.201803	Kyf
41	0.162369	1993	5-Sep	7/12/93-9/5/93			60.3053	-141.119	976.941	495.135	2227.75	33.1739	191.245	1732.62	0.506822	Kvg
42	0.219431	1993	5-Sep	7/12/93-9/5/93			60.1782	-140.198	928.25	262.46	1709.82	26.8804	313.802	1447.36	0.282747	Kym
43	1.49282	1993	15-Mar	10/13/92-3/15/93	9/5/93		60.1022	-140.342	3369.09	842.79	1581.75	37.1615	337.326	738.964	0.250153	Kyf
44	0.285182	1994	31-Jul	6/13/94-7/31/94	8/16/94		60.2434	-140.828	1344.08	696.416	2610.55	33.2278	91.2231	1914.13	0.518136	Kvg
45	3.4305	1994	13-Jun	4/26/94-6/13/94		Dust cloud that extends beyond the main deposit is visible in imagery.	60.1721	-140.034	5179.3	1489.64	2793.55	44.3491	278.366	1303.91	0.287613	Kym
46	0.435973	1994	13-Jun	4/26/94-6/13/94			60.0681	-139.994	1466.75	664.803	1564.78	46.69	301.316	899.975	0.453249	Kyf
47	0.130093	1994	13-Jun	4/26/94-6/13/94	7/31/94		60.2006	-139.809	720.773	166.81	1698.6	23.38	200.875	1531.79	0.231432	Kvm
48	0.261282	1994	31-Jul	7/8/94-7/31/94	8/16/94	Extent of source area is uncertain.	60.0889	-139.711	1277.12	465.797	1265.4	43.667	51.4396	799.607	0.364725	Kyf
49	0.149766	1994	16-Aug	7/31/94-8/16/94			60.1259	-140.311	1140.72	529.14	1631.08	56.6165	8.50287	1101.94	0.463866	Kyf
50	0.428554	1994	13-Jun	4/26/94-6/13/94			60.1141	-139.704	1600.4	563.982	1442.77	42.7904	152.368	878.786	0.3524	Kyn
51	1.69846	1995	9-Jun	4/29/95-6/9/95	9/4/95		60.1023	-140.34	3829.89	949.377	1659.18	40.0834	307.164	709.805	0.247886	Kyf
52	0.953776	1995	26-Aug	7/9/95-8/26/95	9/4/95		60.1085	-140.31	2983.88	772.668	1603.32	21.3363	36.3597	830.652	0.258947	Kyf
53	0.429856	1995	9-Jul	6/9/95-7/9/95	9/4/95		60.1419	-140.185	1429.06	335.198	1437.57	35.372	92.3659	1102.37	0.23456	Kyf
54	0.114528	1995	26-Aug	7/9/95-8/26/95	9/4/95		60.1626	-140.185	906.105	447.63	1693.09	48.1954	70.0454	1245.45	0.494016	Td
55	0.824964	1995	9-Jul	6/9/95-7/9/95	9/4/95		60.1866	-140.128	2837.72	1151.91	2423.58	63.764	198.46	1271.67	0.405927	Td
56	0.4399	1995	26-Aug	7/9/95-8/26/95	9/4/95		60.2063	-140.194	1435.58	159.177	1489.99	25.6019	39.1568	1330.82	0.110879	Kym
57	1.74399	1995	4-Sep	4/29/95-9/4/95			60.0738	-139.845	3817.84	933.39	1886.06	25.0261	13.2037	952.669	0.244482	Kyf
58	0.426004	1995	4-Sep	6/9/95-9/4/95			60.1049	-139.935	2165.49	690.625	1844.05	49.4067	187.815	1153.43	0.318923	Kyf
59	0.496276	1995	9-Jun	4/29/95-6/9/95	9/4/95		60.1242	-139.64	2374.18	1123.24	2094.94	23.3044	298.084	971.693	0.473109	Kyn
60	0.31619	1995	4-Sep	6/9/95-9/4/95		Source area is obscured by shadows.	60.0445	-139.815	1514.14	661.713	1737.54	37.4545	250.971	1075.82	0.437022	Kyf
61	0.170585	1995	4-Sep	6/9/95-9/4/95		Extent of source area is uncertain.	60.0846	-139.979	814.015	424.954	1523.94	42.7335	109.182	1098.99	0.522047	Kyf
62	0.778542	1996	8-May	5/1/96-5/8/96	9/6/96		60.103	-140.337	2840.76	941.984	1735.65	46.7283	305.53	793.667	0.331596	Kyf
63	1.31749	1996	4-Jul	6/2/96-7/4/96	9/6/96		60.1057	-139.936	3050.09	844.235	1938.31	52.2958	160.272	1094.07	0.276791	Kyf
64	0.454268	1996	6-Sep	7/4/96-9/6/96			59.9937	-139.721	1525.6	683.314	1727.31	43.585	304.579	1044	0.447898	Kyf
65	0.201235	1996	6-Sep	7/4/96-9/6/96		Source area is obscured by shadows.	60.0896	-140.123	1360.3	546.524	1360.08	42.1922	5.39264	813.559	0.401768	Kyf
66	0.135893	1997	16-Sep	6/30/97-9/16/97			60.1139	-140.315	972.715	290.062	1413.5	58.5175	62.2938	1123.43	0.298199	Kyf
67	0.671556	1997	30-Jun	5/27/97-6/30/97	9/16/97	Rock avalanche deposit appears to have a high snow and ice content in image from 6/30/97, but rock is exposed in image from 9/16/97.	60.0862	-140.09	2329.09	466.975	1266.15	48.7219	225.152	799.179	0.200497	Kyf
68	0.711619	1997	16-Sep	6/30/97-9/16/97			60.0973	-139.874	1759.81	629.982	1707.28	34.517	353.673	1077.3	0.357983	Kyf
69	0.277508	1997	30-Jun	5/27/97-6/30/97		Rock avalanche deposit appears to have a high snow and ice content in image from 6/30/97, but rock is exposed in image from 9/16/97.	60.071	-140.151	1209.58	560.988	1193.78	53.8807	175.742	632.793	0.463788	Kyf
70	0.619147	1998	28-Sep	7/1/98-9/28/98			60.2301	-140.978	2360.25	439.61	1320.67	43.0218	106.363	881.063	0.186256	Kyf
71	0.409952	1998	28-Sep	8/4/98-9/28/98			60.0866	-139.7	1700.08	516.073	1246.1	47.3397	3.11673	730.023	0.303557	Kyf
72	0.345437	1998	4-Aug	6/24/98-8/4/98			60.0219	-139.764	1775.71	728.111	1859.95	40.532	296.254	1131.84	0.41004	Kyf
73	0.609404	1998	4-Aug	6/24/98-8/4/98			60.1511	-139.723	2908.61	617.834	1735.68	31.4009	8.11025	1117.84	0.212415	Kyn
74	0.352193	1998	24-Jun	6/1/98-6/24/98			60.1449	-139.732	1708.35	738.662	2056.54	30.4751	284.903	1317.88	0.432383	Kyn
75	0.275683	1998	4-Aug	7/1/98-8/4/98			60.1254	-140.322	1194.15	652.954	1725.5	53.7962	15.7826	1072.54	0.546795	Kyf
76	1.04903	1998	15-Jun	6/1/98-6/15/98	1998-06-24		60.0996	-140.35	2724.43	603.069	1313.94	30.3049	234.039	710.867	0.221356	Kyf
77	0.794048	1999	30-Aug	7/13/99-8/30/99			60.2232	-139.578	1552.59	556.928	1982.31	16.2008	179.23	1425.38	0.358709	Kvg
78	1.71128	1999	30-Aug	7/22/99-8/30/99			60.1029	-140.342	3348.06	792.46	1527.12	41.8542	307.877	734.657	0.236692	Kyf
79	0.317667	1999	22-Jul	7/13/99-7/22/99	8/30/99	Extent of source area is uncertain.	60.1233	-140.312	1124.95	457.387	1558.62	31.0375	120.469	1101.23	0.406584	Kyf
80	0.904055	1999	23-Mar	10/30/98-3/23/99	7/17/99, 8/30/99		60.0752	-139.867	2908.51	353.724	1281.94	41.271	211.82	928.212	0.121617	Kyf
81	0.172376	2000	5-Jun	5/20/00-6/5/00	6/12/00		60.2348	-140.456	1134.52	595.197	1700.84	59.4216	189.275	1105.64	0.524625	Kyf (Ql)
82	0.979671	2000	31-Aug	7/7/00-8/31/00	9/9/00		60.1048	-140.302	2475.62	372.37	1187.61	48.1474	116.337	815.239	0.150415	Kyf
83	0.341432	2001	8-Jun	4/21/01-6/8/01	8/11/01		60.0592	-140.092	1445.91	529.302	1411.16	45.4007	141.111	881.863	0.366069	Kyf
84	0.935647	2001	24-Jun	6/8/01-6/24/01	8/11/01	Deposit changes shape between 6/24/01 and 7/19/01, but changes in the source area to confirm a two-part failure are not present. Final deposit was mapped from 8/11/2001 image.	60.1483	-139.903	2978.05	1141.97	2371.03	48.8132	147.582	1229.06	0.383462	Tgp
85	0.576845	2001	19-Jul	6/24/01-7/19/01	8/11/01		60.1458	-139.729	1783.05	849.035	2230.46	59.8865	254.651	1381.42	0.47617	Kyn
86	0.939651	2001	1-Jul	6/24/01-7/1/01	8/11/01		60.1029	-140.336	3020.99	1001.34	1786.68	24.0923	277.271	785.339	0.331462	Kyf
87	0.530586	2001	2-Aug	7/17/01-8/2/01	8/11/01	Two-part failure with RA 89.	60.1251	-140.321	1380.4	699.637	1764.31	63.091	14.4747	1064.67	0.506837	Kyf
88	0.188186	2001	2-Aug	7/19/01-8/2/01	8/11/01		60.1233	-140.318	1402.32	679.437	1806.52	35.7551	74.4371	1127.09	0.48451	Kyf
89	0.183578	2001	17-Jul	7/1/01-7/17/01	7/1/01	Two-part failure with RA 87.	60.1245	-140.319	1478.95	711.056	1781.36	54.2736	0.897759	1070.3	0.480785	Kyf
90	2.37983	2001	21-Apr	3/20/01-4/21/01	6/24/01		60.005	-139.716	5092.42	1557.21	1934.27	31.9365	336.124	377.064	0.305789	Kyf
91	0.32611	2001	17-Jul	7/1/01-7/17/01	8/2/01	Debris ejected past toe of deposit is visible in imagery.	60.08	-140.374	1582.11	441.619	1193.97	57.3012	347.772	752.355	0.279133	Kyf
92	0.588261	2001	17-Jul	7/1/01-7/17/01	8/2/01		60.0705	-140.315	2230.59	799.825	1338.53	35.4172	160.77	538.709	0.358572	Kyf
93	0.59534	2002	14-Aug	7/13/02-8/14/02			60.0737	-139.846	2332.25	814.782	1880.79	33.5348	280.084	1066.01	0.349355	Kyf
94	0.803667	2002	5-Aug	7/13/02-8/5/02			60.184	-140.164	2475.35	1116.14	2341.29	36.1343	192.488	1225.14	0.450905	Td
95	0.247068	2002	5-Aug	7/13/02-8/05/02		Located in same area as RA 97, but the two events are separated by more than a month and are therefore considered as separate events.	60.087	-140.091	1430.6	420.79	1274.76	38.5891	230.796	853.969	0.294135	Kyf
96	0.12486	2002	13-Jul	5/26/02-7/13/02			60.2834	-139.666	710.434	302.763	2518.34	21.4895	184.92	2215.58	0.426167	Kvg
97	0.147685	2002	26-May	5/17/02-5/26/02		Located in same area as RA 95, but the two events are separated by more than a month and are therefore considered as separate events.	60.087	-140.092	1309.75	390.344	1249.91	33.4858	222.314	859.571	0.298029	Kyf
98	0.203232	2002	13-Jul	5/26/02-7/13/02			60.0711	-140.172	912.424	346.383	945.122	30.531	265.183	598.739	0.379629	Kyf
99	0.88402	2003	2-Aug	7/24/03-8/2/03	8/9/03	Extent of source area is uncertain.	60.1902	-139.41	2397.42	1045.42	2997.05	65.4456	217.288	1951.63	0.43606	Kvg
100	0.439979	2003	9-Aug	7/24/03-8/9/03			60.1862	-140.127	2167.65	1088.66	2380.72	65.8347	202.006	1292.05	0.502231	Td
101	0.145603	2003	23-Jul	5/20/03-7/23/03	8/9/03		60.1258	-140.31	1425.42	554.132	1641.65	53.2811	8.34671	1087.52	0.388749	Kyf
102	0.853944	2003	23-Jul	5/20/03-7/23/03	8/9/03	Extent of source area is uncertain.	60.0882	-140.112	2211.64	680.609	1530.46	53.6821	5.43646	849.85	0.30774	Kyf
103	0.809029	2003	23-Jul	5/20/03-7/23/03	8/9/03		60.0884	-140.085	2654.38	782.232	1572.19	50.907	231.94	789.961	0.294694	Kyf
104	0.500052	2004	3-Aug	7/11/04-8/3/04		Deposit is partially obscured by striping.	59.9936	-139.722	1996.32	776.811	1718.61	42.7034	306.954	941.798	0.389122	Kyf
105	0.307782	2004	25-Jun	5/31/04-6/25/04	8/3/04	Source area is partially obscured by striping.	60.1452	-139.737	1298.21	444.952	1811.49	38.5021	244.441	1366.54	0.342744	Kyn
106	0.387084	2004	11-Jul	6/25/04-7/11/04		Source and deposit areas are partially obscured by striping. Deposit changes shape between 7/11/04 and 8/3/04, but changes in the source area to confirm a two-part failure are not present. Final deposit was mapped from 8/3/04 image.	60.1423	-139.85	2395.89	957.693	2039.47	48.1142	164.439	1081.77	0.399724	Tgp
107	0.648055	2004	25-Jun	5/31/04-6/25/04	8/3/04		60.2	-140.115	1955.85	1009.16	2483.29	39.8935	271.399	1474.13	0.515968	Kym
108	0.158644	2004	25-Jun	5/23/04-6/25/04		Source area is obscured by striping and shadows.	60.0106	-139.718	1347.39	483.051	1318.17	54.5994	329.591	835.117	0.358509	Kyf
109	0.744331	2005	5-Jul	6/11/05-7/5/05	7/22/05		60.1799	-139.41	2198.56	375.851	2229.81	15.7729	140.839	1853.96	0.170953	Kvg
110	0.438509	2005	22-Jul	7/5/05-7/22/05			60.2083	-139.896	1301.51	382.668	2236.29	41.6529	353.644	1853.62	0.294018	Tgp
111	0.751707	2005	14-Aug	7/22/05-8/14/05			60.3175	-141.171	1970.26	745.675	2748.42	54.9776	238.913	2002.75	0.378465	Kvg
112	0.229842	2005	26-Jun	5/18/05-6/26/05	7/5/05		60.099	-140.35	1233.24	467.892	1291.03	34.4792	284.24	823.141	0.3794	Kyf
113	0.206388	2005	14-Aug	7/22/05-8/14/05			60.2002	-140.185	1042.37	549.712	1965.11	43.5082	317.397	1415.39	0.527366	Kym
114	1.07027	2005	22-Jul	7/5/05-7/22/05	9/8/05		60.1033	-139.925	2766.33	641.588	1738.13	37.0277	238.711	1096.55	0.231927	Kyf
115	1.67543	2005	8-Sep	8/14/05-9/8/05		Rock avalanche is partially snow covered. Extent of source area is uncertain.	60.1474	-139.843	4599.85	1692.26	2644.38	48.7837	172.504	952.115	0.367895	Tgp
116	0.655103	2005	14-Aug	7/5/05-8/14/05		Extent of source area is uncertain.	60.01	-139.707	2675.02	964.658	1685.19	41.2699	298.902	720.53	0.360617	Kyf
117	0.195575	2005	11-Jun	5/18/05-6/11/05			60.0862	-140.313	861.392	280.506	1118.18	32.9062	315.217	837.672	0.325643	Kyf
118	0.178638	2005	8-Sep	8/14/05-9/8/05			60.0864	-140.107	1538.92	562.287	1386.36	38.2514	116.573	824.078	0.365379	Kyf
119	0.43614	2006	1-Aug	7/17/06-8/1/06			60.1253	-140.321	1443.99	659.249	1722.41	62.8739	9.42097	1063.17	0.456547	Kyf
120	0.143593	2006	17-Jul	6/14/06-7/17/06	8/1/06		60.0904	-140.001	662.722	254.87	1251.51	40.7587	265.403	996.644	0.384581	Kyf
121	0.244241	2006	14-Jun	5/29/06-6/14/06			60.0679	-139.987	1292.85	674.715	1614.71	36.2229	101.81	939.994	0.52188	Kyf
122	0.428226	2006	1-Aug	6/30/06-8/1/06			60.1393	-139.757	1984.08	263.482	1317.29	8.7677	150.77	1053.81	0.132798	Kyn
123	0.687256	2006	29-May	4/19/06-5/29/06	6/14/06		60.073	-139.845	3352.15	966.264	1950.41	46.6626	22.8531	984.143	0.288253	Kyf
124	0.446384	2006	29-May	4/19/06-5/29/06			60.1491	-139.844	2163.34	1596.09	2848.45	15.3727	128.438	1252.35	0.737789	Tgp
125	0.653325	2007	19-Jul	6/10/07-7/19/07			60.1646	-139.747	2100.93	1008.48	2238.86	54.9077	5.29738	1230.38	0.480013	Tgp
126	0.84294	2007	19-Jul	6/10/07-7/19/07			60.0204	-139.783	2371.66	842.165	1786.5	39.6593	327.225	944.331	0.355096	Kyf
127	0.695595	2007	13-Aug	7/19/07-8/13/07	8/28/07	Extent of source area is uncertain.	59.9944	-139.722	2073.13	731.681	1656.13	41.6238	297.387	924.454	0.352936	Kyf
128	0.301443	2007	19-Jul	6/10/07-7/19/07		Source area is obscured by shadows.	60.1105	-140.075	1117.72	360.528	1493.06	43.7096	2.19566	1132.53	0.322558	Kyf
129	0.47988	2007	19-Jul	6/10/07-7/19/07			60.1802	-139.42	2202.46	724.541	2614.99	47.9534	83.4092	1890.45	0.328969	Kvg
130	0.246808	2008	30-Aug	7/14/08-8/30/08			60.1776	-140.122	1204.18	516.78	1799.27	33.1312	167.001	1282.49	0.429157	Kym
131	0.117156	2008	27-May	5/9/08-5/27/08	8/30/08		60.2347	-140.456	1043.31	552.482	1662.86	69.8089	205.193	1110.38	0.529545	Kyf (Ql)
132	0.308524	2008	5-Jul	5/25/08-7/5/08			60.0985	-140.35	1156.39	468.872	1291.52	45.1476	279.771	822.651	0.405461	Kyf
133	0.714333	2008	30-Aug	7/14/08-8/30/08			60.1186	-140.06	2339.36	392.373	1505.33	29.7545	167.852	1112.96	0.167727	Kyf
134	0.685357	2008	5-Jul	5/27/08-7/5/08			60.1315	-139.83	2480.11	796.463	1862.79	32.5794	243.168	1066.33	0.32114	Tgp
135	0.465917	2008	30-Aug	7/14/08-8/30/08		Extent of source area is uncertain. Source area is partially obscured by shadows.	60.1007	-139.874	1516.7	443.743	1513.42	26.7987	19.7294	1069.68	0.292572	Kyf
136	0.14131	2009	8-Jul	6/6/09-7/8/09	8/2/09		60.1003	-139.526	1201.36	628.62	1639.07	9.86193	168.023	1010.45	0.523257	Kyn
137	0.574502	2009	8-Jul	6/6/09-7/8/09	8/2/09		60.0732	-139.845	2211.82	861.043	1938.55	35.3071	2.43975	1077.5	0.389292	Kyf
138	0.367946	2009	2-Aug	7/8/09-8/2/09			60.1447	-139.733	1399.36	628.908	2020.39	36.1356	269.038	1391.48	0.449426	Kyn
139	0.557181	2009	8-Jul	6/6/09-7/8/09	8/2/09		60.1845	-140.122	2157.02	975.407	2249.15	58.3114	219.926	1273.74	0.452201	Td
140	0.188642	2009	2-Aug	7/8/09-8/2/09		Extent of source area is uncertain. Source area is obscured by shadows.	60.1905	-140.118	1221.02	757.016	2763.06	55.1318	280.706	2006.05	0.619986	Td
141	0.163291	2009	2-Aug	7/8/09-8/2/09			60.1105	-140.296	1160.61	454.38	1536.14	45.9469	334.695	1081.76	0.391502	Kyf
142	0.792545	2009	6-Jun	5/5/09-6/6/09		Source area is outside of study area.	60.3411	-141.185	2629.76	1331.24	3440.23	14.3984	155.751	2108.99	0.506223	Kvg
143	0.59403	2010	9-Jun	5/17/10-6/9/10			60.1388	-139.844	2354.56	843.846	1922.35	35.2146	236.41	1078.51	0.358388	Tgp
144	0.145115	2010	4-Aug	6/9/10-8/4/10			60.1269	-140.309	1294.99	408.014	1492.01	39.1237	1.56865	1084	0.315072	Kyf
145	0.265928	2010	13-Sep	8/21/10-9/13/10			60.1253	-140.323	1202.34	675.858	1745.14	40.1522	20.2194	1069.29	0.562121	Kyf
146	0.144239	2010	4-Aug	6/9/10-8/4/10			60.124	-140.312	988.361	461.65	1604.18	36.1796	150.894	1142.53	0.467087	Kyf
147	0.164429	2010	13-Sep	6/9/10-8/4/10			60.1137	-140.316	943.539	370.126	1501.68	31.603	73.8285	1131.56	0.392274	Kyf
148	0.683105	2010	4-Aug	6/9/10-8/4/10			60.0855	-140.087	2087	557.249	1373.36	31.5623	252.032	816.11	0.267009	Kyf
149	0.368779	2010	13-Sep	8/4/10-9/13/10			60.1034	-140.336	1867.34	930.039	1800.51	54.8084	257.459	870.472	0.498055	Kyf
150	0.37387	2010	9-Jun	5/17/10-6/9/10			60.2399	-139.711	1206.05	613.325	2214.28	39.0827	211.043	1600.96	0.508539	Kvg
151	0.345452	2010	23-May	3/20/10-5/23/10	6/9/10		60.2085	-141.213	1670.24	409.632	984.218	30.4733	227.166	574.587	0.245253	Tk
152	0.264841	2011	22-Jul	5/27/11-7/22/11		Deposit is partially obscured by striping.	60.0091	-139.709	1333.51	858.894	1722.43	44.3472	329.832	863.534	0.644086	Kyf
153	0.173405	2011	22-Jul	5/27/11-7/22/11			60.0591	-140.091	1025.85	440.296	1365.5	56.0871	129.549	925.2	0.4292	Kyf
154	0.129817	2011	22-Jul	5/27/11-7/22/11			60.0772	-140.289	1491.6	570.736	1446.56	43.7259	344.004	875.822	0.382633	Kyf
155	0.193213	2011	22-Jul	5/27/11-7/22/11			60.1075	-140.316	1269.14	620.994	1764.17	49.0868	30.7569	1143.18	0.489302	Kyf
156	0.858544	2012	17-Jul	6/22/12-7/17/12		Source and deposit areas are partially obscured by striping	60.0904	-140.085	2576.71	821.086	1629.14	59.7576	216.608	808.05	0.318657	Kyf
157	0.203161	2012	22-Jun	6/6/12-6/22/12			60.0595	-140.089	1142.53	450.084	1366.13	43.9424	175.612	916.049	0.393937	Kyf
158	0.531708	2012	22-Jun	6/6/12-6/22/12		Two-part failure with RA 159.	60.1036	-140.337	2578.66	900.536	1706.41	45.0369	247.725	805.872	0.349226	Kyf
159	1.47743	2012	17-Jul	6/22/12-7/17/12	8/18/12	Two-part failure with RA 158. Deposit area is partially obscured by striping	60.1032	-140.336	3666.22	1076.56	1783.56	48.6389	265.117	707.003	0.293643	Kyf
160	0.498771	2012	22-Jun	6/6/12-6/22/12		Source area and deposit are partially obscured by striping.	60.2734	-140.395	1766.8	609.224	2126	43.192	262.091	1516.78	0.344817	Kvg
161	2.82057	2012	21-May	05/21/2012	6/6/12	Exact date from https://blogs.agu.org/landslideblog/2012/05/24/another-teleseismic-landslide-this-time-in-alaska/	60.0805	-139.54	3925.92	745.166	781.963	37.8418	145.059	36.798	0.189807	Kyn
162	1.18296	2013	12-Jul	6/17/13-7/12/13			60.1163	-139.743	3497.81	802.158	1680.36	29.17	190.939	878.207	0.229331	Kym
163	0.961777	2013	12-Jul	6/17/13-7/12/13			60.0723	-139.838	3133.72	927.875	1918.01	47.3366	329.519	990.136	0.296094	Kyf
164	0.757464	2013	10-Jun	4/14/13-6/10/13	6/17/13		60.14	-139.846	2551.44	889.337	1929.42	37.3953	226.03	1040.08	0.348562	Tgp
165	0.971159	2013	13-Aug	8/11/13-8/13/13		Source area is obscured by shadows.	60.1919	-140.117	2733.39	1198.85	2675.01	30.7778	342.314	1476.16	0.438595	Td
166	0.455884	2013	12-Jul	6/17/13-7/12/13			60.125	-140.323	1806.04	717.776	1764.19	14.0935	4.82165	1046.42	0.39743	Kyf
167	0.112769	2013	10-Jun	4/14/13-6/10/13	6/17/13		60.1242	-140.313	1166.9	509.695	1642.43	42.868	155.09	1132.73	0.436793	Kyf
168	0.896953	2013	13-Aug	8/11/13-8/13/13	8/29/13	Rock avalanche deposit appears to have a high snow and ice content in image from 8/13/13, but rock is exposed in image from 8/29/13.	60.1308	-140.204	3000.81	573.628	1426.67	26.7617	57.021	853.039	0.191158	Kyf
169	0.143537	2013	10-Jun	4/14/13-6/10/13	6/17/13		60.0671	-140.08	993.72	541.821	1592.17	43.2394	71.1567	1050.35	0.545245	Kyf
170	2.10603	2014	14-Jul	6/4/14-7/14/14			60.1893	-139.459	4776.27	1846.09	2945.34	36.9732	179.861	1099.25	0.386513	Kvg
171	0.767098	2014	23-Aug	7/22/14-8/23/14			60.1249	-139.656	2251.04	808.08	1761.61	45.8659	195.6	953.534	0.35898	Kyn
172	0.672966	2014	23-Aug	7/22/14-8/23/14			60.1483	-139.725	3305.06	843.003	1961.25	36.1023	23.637	1118.24	0.255065	Kyn
173	0.361714	2014	4-Jun	5/12/14-6/4/14		Source area is obscured by shadows. Rock avalanche deposit appears to have a high snow and ice content in image from 6/4/14, but rock deposits are exposed later in the summer.	60.0527	-139.851	1674.82	424.986	1483.28	49.8804	307.088	1058.3	0.25375	Kyf
174	0.431591	2014	23-Aug	7/22/14-8/23/14			60.0951	-139.928	1631.23	143.021	1248.18	18.9103	216.864	1105.16	0.0876771	Kyf
175	0.483609	2014	14-Jul	7/1/14-7/14/14	8/23/14	Source area is obscured by shadows. Pre-event date was constrained with Digital Globe, Inc. imagery.	60.0889	-140.109	1648.18	625.061	1503.45	41.2246	277.077	878.391	0.379243	Kyf
176	0.788754	2014	4-Jun	5/18/14-6/4/14		Pre-event date was constrained with Digital Globe, Inc. imagery.	60.1046	-140.304	2139.66	442.508	1317.02	44.3594	150.307	874.516	0.206812	Kyf
177	0.481423	2014	4-Jun	5/12/14-6/4/14			60.1472	-139.846	3036.34	1475.31	2556.58	53.8266	207.567	1081.27	0.485886	Tgp
178	0.128634	2014	15-Jul	6/4/14-7/15/14			60.1526	-139.742	1081.85	545.8	2143.88	39.9088	155.025	1598.08	0.504508	Kyn
179	0.313133	2015	23-Jun	5/22/15-6/23/15			60.2393	-139.706	1384.6	683.171	2248.35	22.8799	195.042	1565.18	0.493407	Kvg
180	0.598931	2015	23-Jun	6/14/15-6/23/15			60.1314	-140.005	2321.16	1053.32	2290.52	29.5852	198.562	1237.2	0.453788	Kym
181	0.141794	2015	25-Jul	6/23/15-7/25/15			60.1136	-140.316	887.74	361.796	1513.24	28.8096	58.309	1151.44	0.407547	Kyf
182	1.27418	2015	25-Jul	6/23/15-7/25/15			60.1037	-140.338	3194.2	888.323	1661.18	43.4724	249.744	772.855	0.278105	Kyf
183	0.178764	2015	2-Sep	8/3/15-9/2/15			60.1299	-140.337	1053.24	408.745	1475.11	41.4687	23.7558	1066.37	0.388085	Kyf
184	1.61883	2015	2-Sep	8/3/15-9/2/15			60.1846	-140.181	3428.53	1271.03	2485.67	47.5797	330.72	1214.65	0.370721	Kym
185	0.21862	2015	15-May	5/6/15-5/15/15	6/23/15		60.1469	-139.862	1620.18	1091.1	2529.34	40.8483	168.213	1438.23	0.673447	Tgp
186	0.329028	2015	23-Jun	5/22/15-6/23/15			60.1967	-139.732	1211.04	574.742	1860.77	46.185	210.162	1286.03	0.474585	Kvm
187	0.256096	2015	25-Jul	6/23/15-7/25/15			60.1715	-139.749	1468.39	717.414	1987.9	50.0177	358.444	1270.49	0.488573	Tgp
188	1.72693	2015	2/9/2016	2015-10-17		Taan Fiord landslide. Because of cloud-cover and poor image quality during winter months, the rock avalanche was not visible in Landsat imagery until 2016. Mapping and attributes are for subaerial deposits only and do not include submarine deposits.	60.1785	-141.2	2491.59	773.485	773.485	26.4893	150.309	0	0.310438	Tk
189	0.450669	2015	23-Jun	6/14/15-6/23/15	7/25/15		60.0855	-140.086	2027.07	573.518	1388.18	36.9079	255.475	814.659	0.28293	Kyf
190	0.417694	2016	31-May	5/15/16-5/31/16		Two-part failure with RA 200.	60.1698	-140.185	1641.61	755.184	1976.16	47.5774	191.25	1220.97	0.460027	Kym
191	0.965797	2016	20-Aug	7/19/16-8/20/16		Source area is partially obscured by shadows.	60.1087	-140.315	2234.62	616.608	1648.65	35.9845	36.0323	1032.04	0.275934	Kyf
192	0.322843	2016	20-Aug	7/19/16-8/20/16	8/28/16		60.125	-140.312	1093.28	543.589	1683.02	13.3897	191.917	1139.43	0.497209	Kyf
193	0.435373	2016	20-Aug	7/19/16-8/20/16	8/28/16		60.1062	-139.936	2332.46	859.518	2009.72	48.3841	149.467	1150.2	0.368503	Kyf
194	1.48204	2016	25-May	5/8/16-5/25/16			60.1511	-139.859	4557.09	2004.02	2971.78	51.4881	166.783	967.759	0.439758	Tgp
195	0.372097	2016	11-Jul	6/9/16-7/11/16	8/20/16		60.2783	-139.551	1455.19	535.572	2319.22	41.7328	102.041	1783.65	0.368043	Kvg
196	0.29111	2016	20-Aug	7/11/16-8/20/16	8/28/16		60.1796	-139.371	1572	616.612	2317.73	44.1875	234.259	1701.12	0.392246	Kvg
197	0.193408	2016	9-Jun	5/8/16-6/9/16	8/28/16		60.1825	-139.478	1654.82	532.343	1889.13	31.5847	203.473	1356.79	0.321692	Kvg
198	0.223133	2016	11-Jul	6/9/16-7/11/16	7/19/16		60.188	-140.556	1132.64	413.916	1724.58	51.6823	347.081	1310.66	0.365442	Tps
199	0.659756	2016	20-Aug	7/19/16-8/20/16		Source area is partially obscured by shadows.	60.0437	-139.812	1903.25	814.566	1873.36	42.4242	262.744	1058.79	0.427987	Kyf
200	0.197266	2016	15-May	5/8/16-5/15/16		Two-part failure with RA 190.	60.1694	-140.184	1145.31	692.291	1930.13	41.4969	179.55	1237.84	0.604457	Kym
201	0.141642	2016	11-Jul	6/9/16-7/11/16			60.1139	-140.315	771.931	315.179	1469.33	61.859	71.5213	1154.15	0.408299	Kyf
202	0.553134	2016	31-May	5/15/16-5/31/16			60.1738	-140.052	1919.58	615.263	1969.02	30.8633	245.943	1353.76	0.32052	Kym
203	0.600689	2016	31-May	5/15/16-5/31/16		Extent of source area is uncertain.	60.1003	-140.351	1962.88	504.768	1287.87	26.2272	289.597	783.104	0.257156	Kyf
204	1.18656	2017	8-Aug	7/22/2017	8/15/17	Deposit not visible in imagery until 8/8/17. Exact date determined from seismic signal analysis.	60.0729	-139.838	3665.79	956.616	1911.45	41.4251	16.4177	954.838	0.260958	Kyf
205	0.305058	2017	14-Jul	5/27/17-7/14/17	8/15/17	Extent of source area is uncertain.	60.1506	-139.748	1522.25	591.593	1903.63	52.0258	228.214	1312.03	0.388632	Kyn
206	1.0982	2018	3-Jul	6/8/18-7/3/18	9/3/18	Post-event date constrained with Digital Globe, Inc. imagery.	60.1839	-140.122	2588.51	965.199	2215.51	48.2931	250.189	1250.31	0.372879	Td
207	1.23776	2018	3-Sep	7/1/18-9/3/18	9/3/18		60.1457	-139.726	3483.81	1071.05	2188.58	47.1677	42.1383	1117.53	0.307436	Kyn
208	0.263021	2018	3-Sep	7/24/18-9/3/18			60.1679	-140.18	1187.34	331.444	1557.37	46.9271	103.615	1225.92	0.279149	Kym
209	0.784018	2018	24-Jul	7/3/18-7/24/18		Source area is obscured by shadows. Pre-event date was confined with Digital Globe, Inc. imagery.	60.0907	-140.115	1912.17	416.162	1274.73	26.656	27.4472	858.57	0.217639	Kyf
210	0.137998	2018	24-Jul	7/3/18-7/24/18	9/3/18	Pre-event date was confined with Digital Globe, Inc. imagery.	60.1221	-140.31	772.313	297.733	1424.24	32.7463	134.256	1126.5	0.385508	Kyf
211	0.189469	2018	3-Sep	7/1/18-9/3/18	9/3/18		60.1553	-140.266	1078.02	468.298	1722.65	26.9396	22.2927	1254.35	0.434407	QTy
212	0.42438	2018	1-Jul	6/8/18-7/1/18	7/24/18		60.0999	-140.348	1711.59	567.407	1363.14	23.1323	263.244	795.734	0.33151	Kyf
213	0.107173	2018	6-Jun	5/6/18-6/6/18	7/24/18		60.0944	-140.324	676.36	269.356	1112.97	17.2262	151.98	843.61	0.398244	Kyf
214	0.187027	2018	24-Jul	7/3/18-7/24/18		Pre-event date confined with Digital Globe, Inc. imagery.	60.1138	-140.314	1199.63	299.162	1398.56	60.2576	61.4444	1099.39	0.249379	Kyf
215	0.163275	2019	9-Jun	5/1/19-6/9/19		Max elevation, slope, and aspect were extracted from USGS NED 1 arc-second DEM.	60.255	-140.697	844.195	394.391	1712.21	14.3375	223.774	1317.82	0.46718	Tk
216	0.464774	2019	4-Jul	6/27/19-7/4/19			60.0078	-139.724	2052.83	697.392	1488.17	24.4233	23.6007	790.776	0.339722	Kyf
217	0.320953	2019	27-Jun	5/1/19-6/27/19	7/4/19	Extent of source area is uncertain.	60.1418	-139.856	1896.9	778.762	1939.81	25.2718	152.304	1161.05	0.410544	Tgp
218	0.30127	2019	27-Jun	5/1/19-6/27/19	8/21/19		60.1396	-139.757	1435.8	215.613	1330.12	20.5937	138.095	1114.5	0.150169	Kyn
219	0.425652	2019	21-Aug	7/4/19-8/21/19	8/21/19		60.1104	-140.075	2315.38	508.088	1510.6	40.972	21.1194	1002.51	0.219441	Kyf
220	0.423698	2019	21-Aug	7/4/19-8/21/19			60.1253	-140.322	1396.01	665.387	1741.34	48.4327	6.35995	1075.95	0.476633	Kyf
